# Supplementary material
Source: HighWire-hosted journal article supplement (https://mbio.asm.org/content/suppl/2016/10/13/mBio.01579-16)
Supplement: mbo005163039st2.pdf [file mbo005163039st2.pdf]

**Table S2. Strains, plasmids, and primers used in the present study.**

|                                        | Designation/sequence                                                                                                                                                                                                                                                                             | Reference/source/purpose              |
|----------------------------------------|--------------------------------------------------------------------------------------------------------------------------------------------------------------------------------------------------------------------------------------------------------------------------------------------------|---------------------------------------|
| <b>Strains</b>                         |                                                                                                                                                                                                                                                                                                  |                                       |
| MW2 (WT)                               | <i>S. aureus</i> MW2, community-associated MRSA strain                                                                                                                                                                                                                                           | (Baba et al., 2002) <sup>1</sup>      |
| $\Delta psm\alpha\beta hld$            | <i>S. aureus</i> MW2 with <i>psm\alpha</i> and <i>psm\beta</i> operons deleted and the <i>hld</i> start codon altered to abolish translation                                                                                                                                                     | (Cheung et al., 2012)                 |
| $\Delta psm\alpha\beta hld\Delta pmtR$ | $\Delta psm\alpha\beta hld$ with <i>pmtR</i> gene deleted                                                                                                                                                                                                                                        | This study                            |
| $\Delta agr$                           | <i>S. aureus</i> MW2 with <i>agr</i> system deleted                                                                                                                                                                                                                                              | (Wang et al., 2007)                   |
| <i>E. coli</i> BL21 (DE3)              | <i>E. coli</i> host for protein expression<br><i>fhuA2 [lon] ompT gal (<math>\lambda</math> DE3) [dcm] <math>\Delta hsdS</math><br/><math>\lambda</math> DE3 = <math>\lambda</math> sBamHlo <math>\Delta</math>EcoRI-B<br/><i>int::(lacI::PlacUV5::T7 gene1) i21 <math>\Delta</math>nin5</i></i> | Life Technologies                     |
| <b>Plasmids</b>                        |                                                                                                                                                                                                                                                                                                  |                                       |
| <i>pTXpmtR</i>                         | Constitutive expression vector expressing PmtR; tet <sup>R</sup>                                                                                                                                                                                                                                 | This study                            |
| <i>pTX.16</i>                          | Control vector for pTX plasmid series; tet <sup>R</sup>                                                                                                                                                                                                                                          | (Wang et al., 2007)                   |
| <i>pTXpsm\alpha</i>                    | Xylose-inducible expression vector expressing PSM $\alpha$ 1-4; tet <sup>R</sup>                                                                                                                                                                                                                 | (Chatterjee et al., 2013)             |
| <i>pKX16</i>                           | Control vector for pKX plasmid series; kan <sup>R</sup>                                                                                                                                                                                                                                          | (Chatterjee et al., 2011)             |
| <i>pKXpsm\alpha</i>                    | pKX expressing PSM $\alpha$ 1-4 upon xylose induction; kan <sup>R</sup>                                                                                                                                                                                                                          | This study                            |
| <i>pKXpsm\beta</i>                     | pKX expressing PSM $\beta$ 1-2 upon xylose induction; kan <sup>R</sup>                                                                                                                                                                                                                           | This study                            |
| <i>pKXhld</i>                          | pKX expressing $\delta$ -toxin upon xylose induction; kan <sup>R</sup>                                                                                                                                                                                                                           | This study                            |
| <i>pGEX-4T-1</i>                       | Vector for GST fusion protein cloning and expression; amp <sup>R</sup>                                                                                                                                                                                                                           | GE Healthcare                         |
| <i>pGEX-4T-1gst-pmtR</i>               | Vector expressing GST-PmtR; amp <sup>R</sup>                                                                                                                                                                                                                                                     | This study                            |
| <i>pTX16</i>                           | Control vector for pTX plasmid series; tet <sup>R</sup>                                                                                                                                                                                                                                          | (Peschel et al., 1996)                |
| <i>pTXpsm\alpha1</i>                   | pTX expressing PSM $\alpha$ 1 upon xylose induction; tet <sup>R</sup>                                                                                                                                                                                                                            | This study                            |
| <i>pTXpsm\alpha2</i>                   | pTX expressing PSM $\alpha$ 2 upon xylose induction; tet <sup>R</sup>                                                                                                                                                                                                                            | This study                            |
| <i>pTXpsm\alpha3</i>                   | pTX expressing PSM $\alpha$ 3 upon xylose induction; tet <sup>R</sup>                                                                                                                                                                                                                            | This study                            |
| <i>pTXpsm\alpha4</i>                   | pTX expressing PSM $\alpha$ 4 upon xylose induction; tet <sup>R</sup>                                                                                                                                                                                                                            | This study                            |
| <b>Primers</b>                         |                                                                                                                                                                                                                                                                                                  |                                       |
| pmtR-P1                                | ggggacaagttgtacaaaaagcaggcttccgtcttgttgcgcc<br>atacctatagttgc                                                                                                                                                                                                                                    | Deletion of <i>pmtR</i>               |
| pmtR-P2                                | caacgtcccctatcatttctg                                                                                                                                                                                                                                                                            | Deletion of <i>pmtR</i>               |
| pmtR-P3                                | gtgataggggacgttgatgaatgccatagaattaagtaatg                                                                                                                                                                                                                                                        | Deletion of <i>pmtR</i>               |
| pmtR-P4                                | ggggaccactttgtacaagaagctgggttaggtaaaagaactttgtt<br>gagcaagc                                                                                                                                                                                                                                      | Deletion of <i>pmtR</i>               |
| pmtR-for                               | gaggatcctaggggacgttgatgaaataattttaaaaacaatag                                                                                                                                                                                                                                                     | Cloning of <i>pmtR</i> into pTX.      |
| pmtR-rev                               | tctaacgcgttcgatgatctctcctcataatgaacg                                                                                                                                                                                                                                                             | Cloning of <i>pmtR</i> into pTX.      |
| GST-pmtR-for                           | gtggaggatccgagaacctgtactccagggtatgaaataatttaa<br>aaaacaatagtgatttccgatttatgaacagattaagc                                                                                                                                                                                                          | Cloning of <i>pmtR</i> into pGEX-4T-1 |

|                |                                                              |                                                       |
|----------------|--------------------------------------------------------------|-------------------------------------------------------|
| GST-pmtR-rev   | cagtcgactcatgatgattcctcctcataatgaacg                         | Cloning of <i>pmtR</i> into pGEX-4T-1                 |
| PpmtR-for      | agacattcgtttaggtacctttttattg                                 | Amplification of <i>pmtR</i> promoter                 |
| PpmtR-rev      | caacgtccccctatcactttctgtatatatac                             | Amplification of <i>pmtR</i> promoter                 |
| PpmtR-for[BTN] | [BTN]caacgtccccctatcactttctgtatatatacaatatacac               | Amplification of biotin-labeled <i>pmtR</i> promoter  |
| PpmtRmut1-rev  | caacgtccccctatcactttctgtatatatacaatatacaaatvtacac<br>agttttg | Introduction of 1-bp mutation in <i>pmtR</i> promoter |
| PpmtRmut1-for  | caacgtccccctatcactttccgtatatatacaatatacaaatatacac<br>agttttg | Introduction of 1-bp mutation in <i>pmtR</i> promoter |
| M13L           | gtaaaacgacggccag                                             | Fragment analysis (Queck et al., 2008)                |
| M13R           | caggaaacagctatgac                                            | Fragment analysis (Queck et al., 2008)                |
| *M13L          | [FAM]gtaaaacgacggccag                                        | Fragment analysis (Queck et al., 2008)                |
| *M13R          | [FAM]caggaaacagctatgac                                       | Fragment analysis (Queck et al., 2008)                |

#### 5'RACE

|            |                         |                  |
|------------|-------------------------|------------------|
| Pmtrace1   | aattcttaaccaaatttcaatg  | RNA adapter, PCR |
| Pmtrace2   | taccagcgcatttctacc      | PCR              |
| Pmtraceseq | ctctttaaaatagaactatcttg | Sequencing       |

#### Primers and probes for qRT-PCR

|           |                           |                        |
|-----------|---------------------------|------------------------|
| pmt-for   | cgtagagtcaaagtgccatgatgt  | qRT-PCR of <i>pmtB</i> |
| pmt-probe | caattgcaatagtgttggtgaa    | qRT-PCR of <i>pmtB</i> |
| pmt-rev   | tgggaatgatgattgactagaagaa | qRT-PCR of <i>pmtB</i> |

#### Randomized DNA fragment for EMSA control

AATCACAATCTACTACCTTACTGGAATTTAATTTATCTTATAATTTCCCTTGCATATAAGTTACAT  
TACTTCAGCCTCCTAATTGTACCCTTAGCACGAAGACAAATTTGTTCTTACCTATATTTTCATCATT  
GGTAAGGGGATTGCATGTCCCACGTAAAACATTGTTAAACTCTTAGGTTTTTGAACGATAAAAAC  
TTT

---

#### <sup>1</sup>References

- Baba, T., Takeuchi, F., Kuroda, M., Yuzawa, H., Aoki, K., Oguchi, A., Nagai, Y., Iwama, N., Asano, K., Naimi, T., *et al.* (2002). Genome and virulence determinants of high virulence community-acquired MRSA. *Lancet* *359*, 1819-1827.
- Chatterjee, S.S., Chen, L., Joo, H.S., Cheung, G.Y., Kreiswirth, B.N., and Otto, M. (2011). Distribution and regulation of the mobile genetic element-encoded phenol-soluble modulins PSM-mec in methicillin-resistant *Staphylococcus aureus*. *PLoS One* *6*, e28781.
- Chatterjee, S.S., Joo, H.S., Duong, A.C., Dieringer, T.D., Tan, V.Y., Song, Y., Fischer, E.R., Cheung, G.Y.C., Li, M., and Otto, M. (2013). Essential *Staphylococcus aureus* toxin export system. *Nat Med* *19*, 364-367.
- Cheung, G.Y., Duong, A.C., and Otto, M. (2012). Direct and synergistic hemolysis caused by *Staphylococcus* phenol-soluble modulins: implications for diagnosis and pathogenesis. *Microbes Infect* *14*, 380-386.
- Peschel, A., Ottenwalder, B., and Gotz, F. (1996). Inducible production and cellular location of the epidermin biosynthetic enzyme EpiB using an improved staphylococcal expression system. *FEMS Microbiol Lett* *137*, 279-284.

Queck, S.Y., Jameson-Lee, M., Villaruz, A.E., Bach, T.H., Khan, B.A., Sturdevant, D.E., Ricklefs, S.M., Li, M., and Otto, M. (2008). RNAIII-independent target gene control by the agr quorum-sensing system: insight into the evolution of virulence regulation in *Staphylococcus aureus*. *Mol Cell* 32, 150-158.

Wang, R., Braughton, K.R., Kretschmer, D., Bach, T.H., Queck, S.Y., Li, M., Kennedy, A.D., Dorward, D.W., Klebanoff, S.J., Peschel, A., *et al.* (2007). Identification of novel cytolytic peptides as key virulence determinants for community-associated MRSA. *Nat Med* 13, 1510-1514.
